# Supplementary material for: A novel preoperative predictive model of 90-day mortality after liver resection for huge hepatocellular carcinoma
Source: PubMed Central journal article supplement — Ann Transl Med. 2021 May;9(9):774. doi: 10.21037/atm-20-7842 (PMC8246173; doi:10.21037/atm-20-7842), 2021-05
Supplement: atm-09-09-774-supplementary.pdf [file atm-09-09-774-supplementary.pdf]

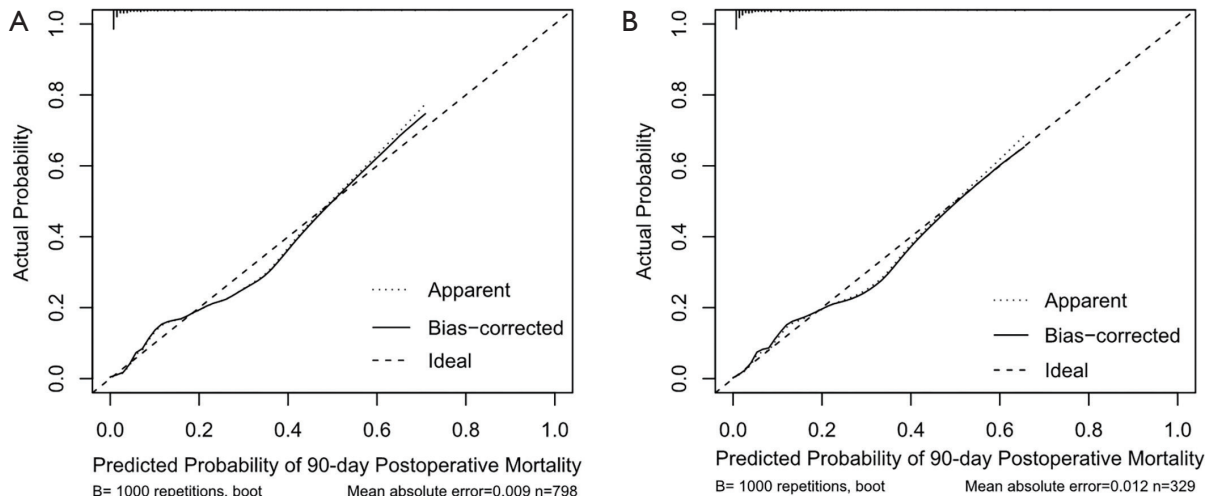

**Figure S1** Calibration Curve by bootstrap method of the model. The apparent and the bias-corrected curves showed good agreement with the ideal curve in both (A) training cohort, and (B) validation cohort.

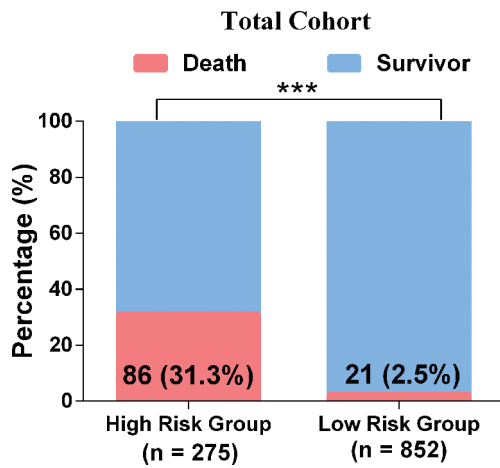

**Figure S2** The predictive performance of the APP score for the postoperative 90-day mortality for huge HCC in the entire retrospective cohort. In the entire cohort, the higher incidence of 90-day mortality after hepatectomy was observed in the high-risk group (APP score  $>-1.96$ ) compared with that of the low-risk group (APP score  $\leq -1.96$ ), (31.3% vs. 2.5%, \*\*\* $P < 0.001$ ).

**Table S1** Detailed clinicopathologic characteristics of the training, validation, and prospective cohorts

| Characteristics                      | Training cohort (n=798) | Validation cohort (n=329) | P value | Prospective cohort (n=93) |
|--------------------------------------|-------------------------|---------------------------|---------|---------------------------|
| Diabetes mellitus                    |                         |                           |         |                           |
| No                                   | 719                     | 294                       | 0.709   | 82                        |
| Yes                                  | 79                      | 35                        |         | 11                        |
| Hypertension                         |                         |                           |         |                           |
| No                                   | 744                     | 306                       | 0.892   | 85                        |
| Yes                                  | 54                      | 23                        |         | 8                         |
| CNLC staging                         |                         |                           |         |                           |
| I-II                                 | 596                     | 258                       | 0.184   | 71                        |
| III                                  | 202                     | 71                        |         | 22                        |
| BCLC staging                         |                         |                           |         |                           |
| A                                    | 494                     | 189                       | 0.164   | 59                        |
| B-C                                  | 304                     | 140                       |         | 34                        |
| ALT (U/L)                            | 80.9±228.3              | 71.0±167.2                | 0.473   | 40.7±39.8                 |
| Platelet counts (10 <sup>9</sup> /L) | 193.6±77.1              | 202.1±74.0                | 0.090   | 207.9±66.8                |
| TB (μmol/L)                          | 14.0±13.0               | 13.5±17.4                 | 0.642   | 13.7±4.9                  |
| Albumin (g/L)                        | 39.6±4.2                | 39.2±3.8                  | 0.096   | 42.0±4.4                  |
| Prothrombin time (s)                 | 12.3±1.2                | 12.2±1.0                  | 0.093   | 12.1±0.9                  |
| Creatine (μmol/L)                    | 71.6±17.5               | 71.9±15.8                 | 0.799   | 73.8±13.7                 |
| Blood loss (mL)                      | 473.1±525.0             | 536.1±597.7               | 0.059   | 480.1±621.0               |
| intraoperative transfusion           |                         |                           |         |                           |
| No                                   | 444                     | 258                       | 0.637   | 76                        |
| Yes                                  | 134                     | 71                        |         | 17                        |
| Tumor differentiation                |                         |                           |         |                           |
| I-II                                 | 563                     | 265                       | 0.001*  | 67                        |
| III-IV                               | 235                     | 64                        |         | 26                        |
| Microvascular Invasion               |                         |                           |         |                           |
| No                                   | 318                     | 110                       | 0.051   | 26                        |
| Yes                                  | 480                     | 219                       |         | 67                        |

CNLC staging, China liver cancer staging; BCLC staging, Barcelona clinic liver cancer staging; GGT,  $\gamma$ -glutamyl transpeptidase; ALT, alanine aminotransferase; TB, total bilirubin.

**Table S2** The subgroup analysis of APP score in the 90-day mortality in training and validation cohort

| Cohort                     | AUC   | 95% CI      | 90-day mortality, n (%) |                |
|----------------------------|-------|-------------|-------------------------|----------------|
|                            |       |             | High risk group         | Low risk group |
| Training cohort            |       |             |                         |                |
| Cirrhosis                  |       |             |                         |                |
| Yes                        | 0.800 | 0.737–0.863 | 42 (32.8)               | 0 (0.0)        |
| No                         | 0.860 | 0.804–0.917 | 20 (28.8)               | 15 (2.9)       |
| Preoperative TACE          |       |             |                         |                |
| Yes                        | 0.965 | 0.927–1.00  | 5 (25.0)                | 0 (0.0)        |
| No                         | 0.863 | 0.824–0.902 | 57 (31.7)               | 15 (2.9)       |
| Anatomical liver resection |       |             |                         |                |
| Yes                        | 0.880 | 0.836–0.925 | 37 (35.9)               | 6 (2.3)        |
| No                         | 0.861 | 0.803–0.918 | 25 (25.7)               | 9 (2.7)        |
| Validation cohort          |       |             |                         |                |
| Cirrhosis                  |       |             |                         |                |
| Yes                        | 0.885 | 0.797–0.973 | 8 (25.8)                | 1 (1.6)        |
| No                         | 0.918 | 0.863–0.973 | 16 (36.4)               | 5 (2.6)        |
| Preoperative TACE          |       |             |                         |                |
| Yes                        | 0.906 | 0.805–1.00  | 1 (16.7)                | 0 (0.0)        |
| No                         | 0.905 | 0.857–0.954 | 23 (33.3)               | 6 (2.6)        |
| Anatomical liver resection |       |             |                         |                |
| Yes                        | 0.894 | 0.826–0.962 | 12 (27.3)               | 2 (1.9)        |
| No                         | 0.915 | 0.845–0.984 | 12 (38.7)               | 4 (2.7)        |

AUC, area under curve; 95% CI, 95% confidential interval; TACE, transcatheter arterial chemoembolization.
